# Supplementary material for: Electronic structure of 2D hybrid perovskites: Rashba spin–orbit coupling and impact of interlayer spacing
Source: Royal Society of Chemistry journal article supplement (doi:10.1039/d2ta05255e), 2022-01-01
Supplement: d2ta05255e1.pdf [file d2ta05255e1.pdf]

# Electronic Structure of 2D Hybrid Perovskites: Rashba Spin-Orbit Coupling and Impact of Interlayer Spacing

Meysam Pazoki,<sup>†a,b</sup> Roghayeh Imani,<sup>†c</sup> Andreas Röckert,<sup>c</sup> and Tomas Edvinsson<sup>\*a</sup>

## Supporting Information

---

<sup>a</sup> Department of Materials Science and Engineering, Solid State Physics, Ångström Laboratory, Uppsala University, Box 34, 75121 Uppsala, Sweden.

<sup>b</sup> Department of Physics, Shiraz University, Shiraz 71454, Iran.

<sup>c</sup> Department of Chemistry, Structural Chemistry, Ångström Laboratory, Uppsala University, Box 538, 75121 Uppsala, Sweden.

<sup>†</sup> These authors contributed equally to this work.

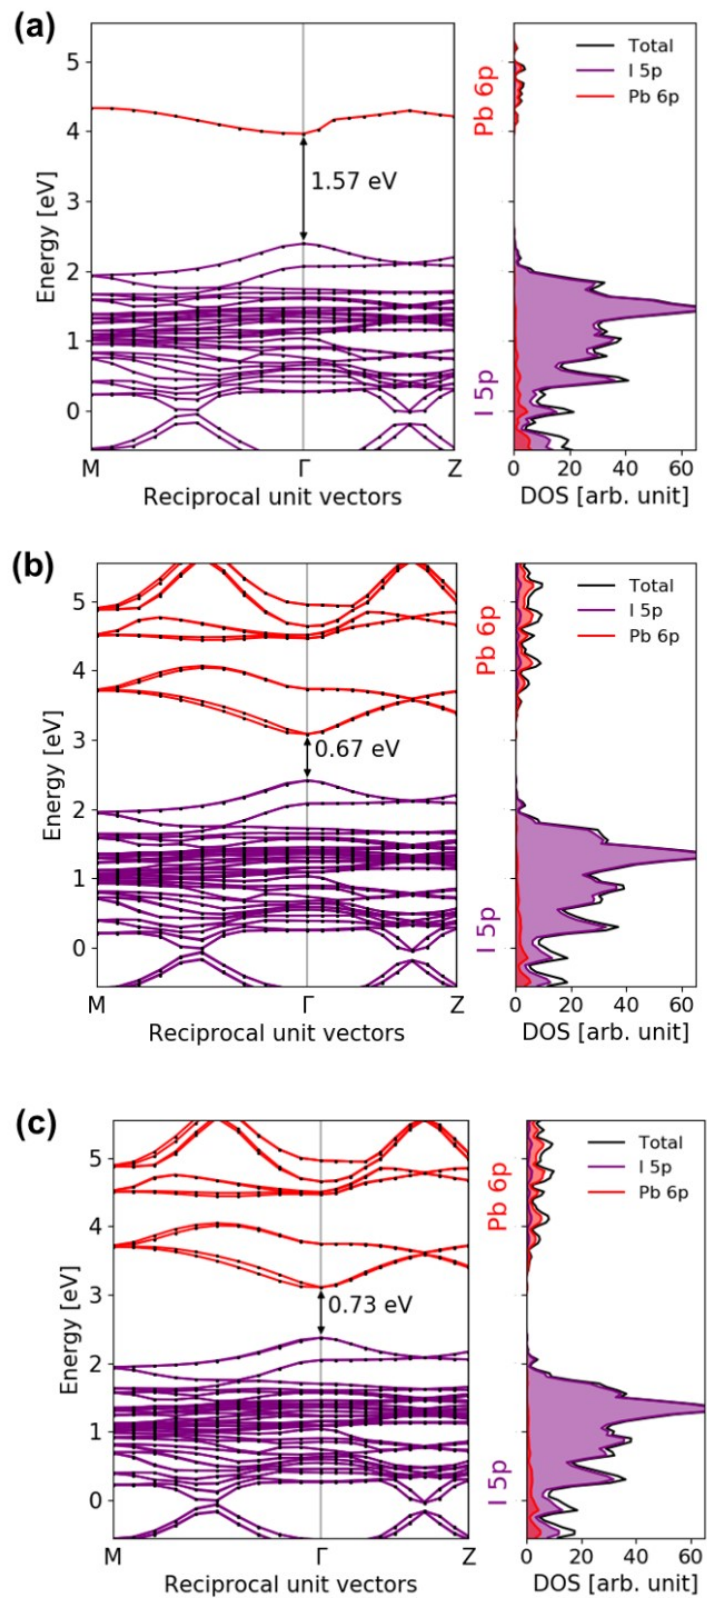

**Fig. S1** Calculated band structure and the corresponding partial density of states (PDOS) of MAPbI<sub>3</sub> within: (a) GGA approximation without SOC, core electrons represented by scalar-relativistic pseudopotentials, (b) GGA approximation with SOC, using projected augmented wave functions, (c) GGA approximation with SOC including the van der Waals effects, using projected augmented wave functions.

**Table. S1** Lattice parameters of the relaxed structures.

| Structure           | Method              | Lattice parameters                              |                                                  |                                                   |
|---------------------|---------------------|-------------------------------------------------|--------------------------------------------------|---------------------------------------------------|
|                     |                     | a                                               | b                                                | c                                                 |
| BDAPbI <sub>4</sub> | Scalar relativistic | +1.016480934i<br>+0.001094221j<br>-0.011516648k | +0.010714555i<br>+1.055049708j<br>-0.009417520k  | +0.453032042i<br>+0.302087656j<br>+1.235248221k   |
|                     | SOC                 | +1.016480934i<br>+0.001094221j<br>-0.011516648k | +0.010714555i<br>+1.055049708j<br>-0.009417520k  | +0.453032042i<br>+0.302087656j<br>+1.235248221k   |
|                     | SOC+London          | +1.016480934i<br>+0.001094221j<br>-0.011516648k | +0.010714555i<br>+1.055049708j<br>-0.009417520k  | +0.453032042i<br>+0.302087656j<br>+1.235248221k   |
| HDAPbI <sub>4</sub> | Scalar relativistic | +1.000000000i<br>+0.000000000j<br>+0.000000000k | +0.000000000i<br>+0.7158443164j<br>+0.000000000k | -0.2244716445i<br>+0.000000000j<br>+0.7308821332k |
|                     | SOC                 | +1.000000000i<br>+0.000000000j<br>+0.000000000k | +0.000000000i<br>+0.715844316j<br>+0.000000000k  | -0.224471644i<br>+0.000000000j<br>+0.730882133k   |
|                     | SOC+London          | +1.000000000i<br>+0.000000000j<br>+0.000000000k | +0.000000000i<br>+0.715844316j<br>+0.000000000k  | -0.224471644i<br>+0.000000000j<br>+0.730882133k   |
| ODAPbI <sub>4</sub> | Scalar relativistic | +1.000000000i<br>+0.000000000j<br>+0.000000000k | +0.000000000i<br>+0.60749364j<br>+0.000000000k   | -0.18701i<br>+0.0000j<br>+0.6282k                 |
|                     | SOC                 | +1.000000000i<br>+0.000000000j<br>+0.000000000k | +0.000000000i<br>+0.60749364j<br>+0.000000000k   | -0.187010000i<br>+0.000000000j<br>+0.628200000k   |
|                     | SOC+London          | +1.000000000i<br>+0.000000000j<br>+0.000000000k | +0.000000000i<br>+0.60749364j<br>+0.000000000k   | -0.187010000i<br>+0.000000000j<br>+0.628200000k   |
| DDAPbI <sub>4</sub> | Scalar relativistic | +1.126691658i<br>+0.006270929j<br>+0.100747423k | +0.004816344i<br>+0.599415307j<br>+0.002201466k  | -0.150646731i<br>-0.000679544j<br>+0.612748237k   |
|                     | SOC                 | +1.126691658i<br>+0.006270929j<br>+0.100747423k | +0.004816344i<br>+0.599415307j<br>+0.002201466k  | -0.150646731i<br>-0.000679544j<br>+0.612748237k   |

|                          |                            |                                                 |                                                 |                                                 |
|--------------------------|----------------------------|-------------------------------------------------|-------------------------------------------------|-------------------------------------------------|
|                          | <b>SOC+London</b>          | +1.126691658i<br>+0.006270929j<br>+0.100747423k | +0.004816344i<br>+0.599415307j<br>+0.002201466k | -0.150646731i<br>-0.000679544j<br>+0.612748237k |
| <b>MAPbI<sub>3</sub></b> | <b>Scalar relativistic</b> | +0.988930439i<br>-0.000060348j<br>+0.000218033k | -0.000060722i<br>+0.986392170j<br>-0.000695749k | +0.000307984i<br>-0.000982271j<br>+1.442764694k |
|                          | <b>SOC</b>                 | +1.000000000i<br>+0.000000000j<br>+0.000000000k | +0.000000000i<br>+1.000000000j<br>+0.000000000k | +0.000000000i<br>+0.000000000j<br>+1.429581282k |
|                          | <b>SOC+London</b>          | +1.000000000i<br>+0.000000000j<br>+0.000000000k | +0.000000000i<br>+1.000000000j<br>+0.000000000k | +0.000000000i<br>+0.000000000j<br>+1.429581282k |

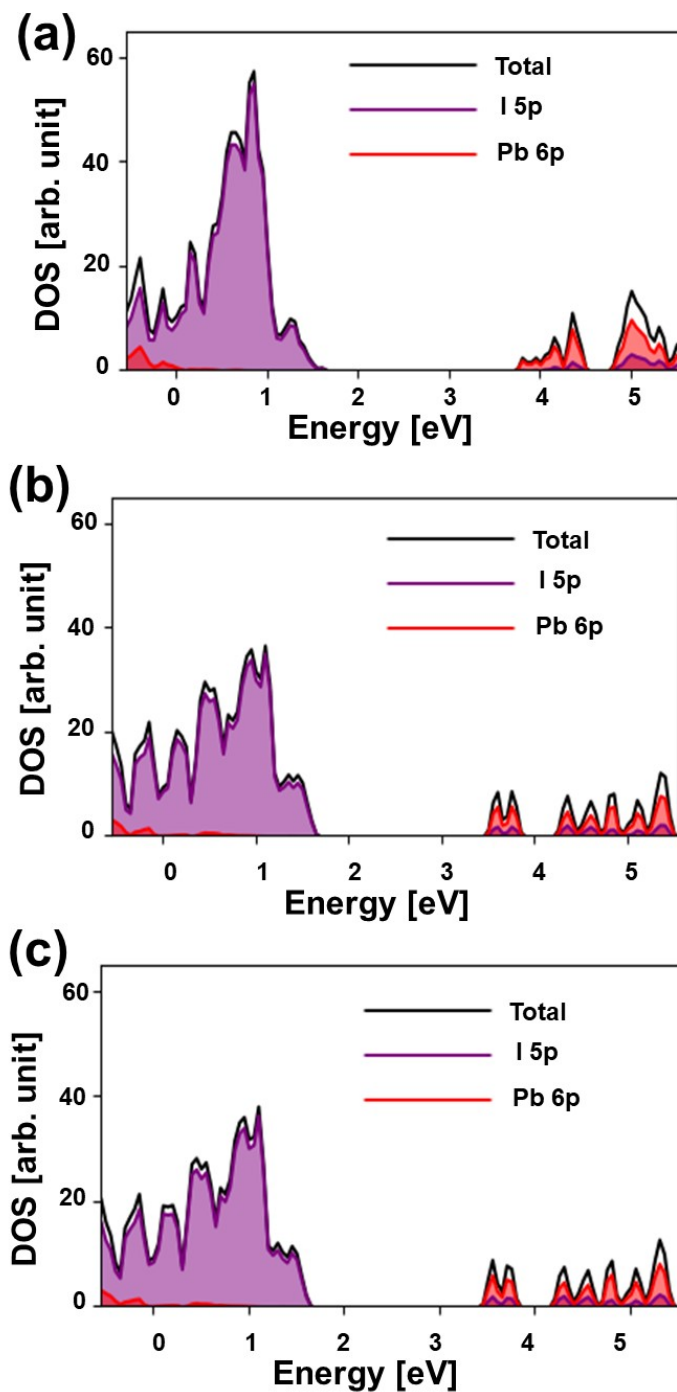

**Fig. S2** Calculated total and partial density of states (PDOS) of BDAPbI<sub>4</sub> within: (a) GGA approximation without SOC, core electrons represented by scalar-relativistic pseudopotentials, (b) GGA approximation with SOC, using projected augmented wave functions, (c) GGA approximation with SOC including London dispersion, using projected augmented wave functions.

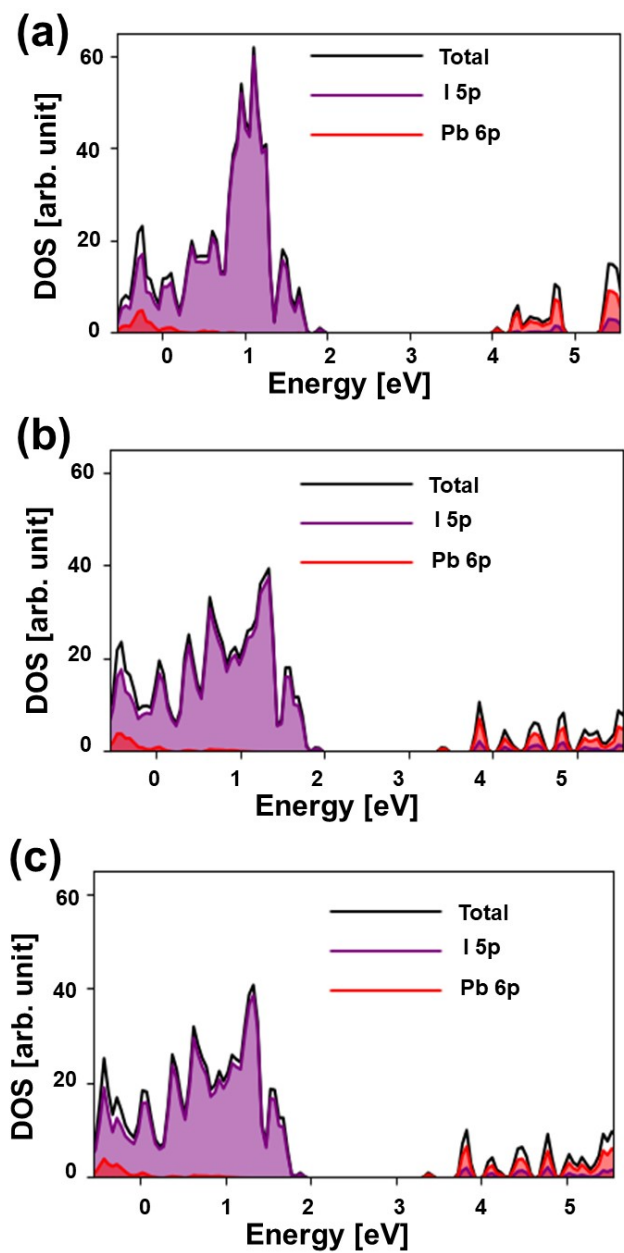

**Fig. S3** Calculated total and partial density of states (PDOS) of HDAPbI<sub>4</sub> within: (a) GGA approximation without SOC, core electrons represented by scalar-relativistic pseudopotentials, (b) GGA approximation with SOC, using projected augmented wave functions, (c) GGA approximation with SOC including London dispersion, using projected augmented wave functions.

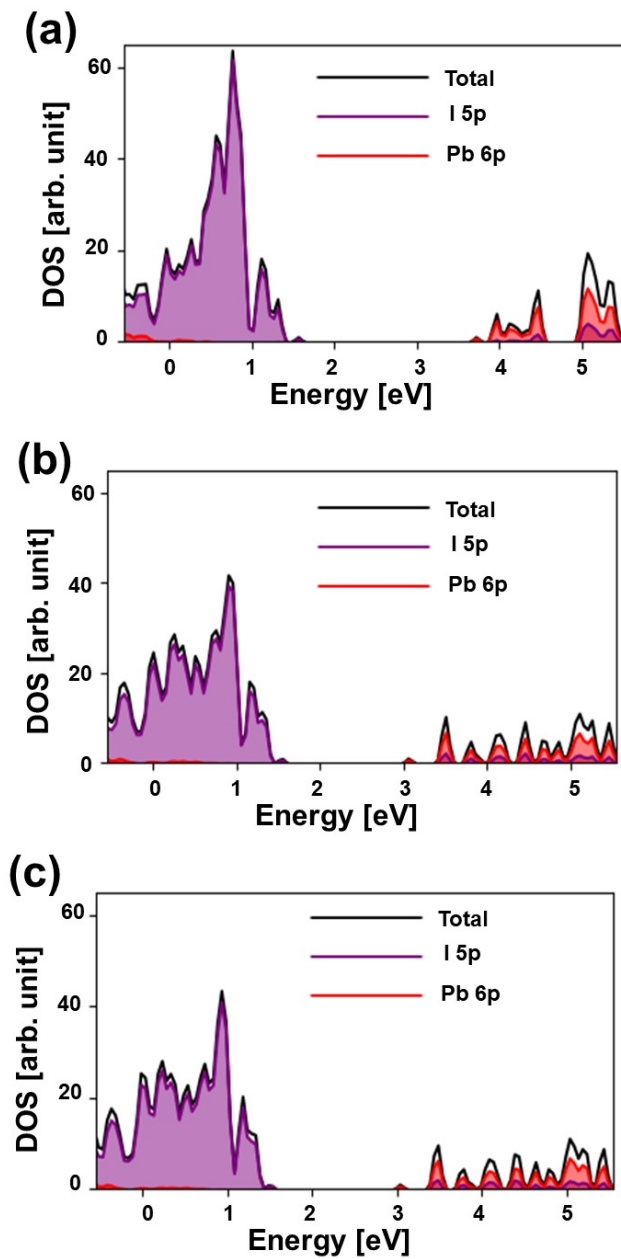

**Fig. S4** Calculated total and partial density of states (PDOS) of ODAPbI<sub>4</sub> within: (a) GGA approximation without SOC, core electrons represented by scalar-relativistic pseudopotentials, (b) GGA approximation with SOC, using projected augmented wave functions, (c) GGA approximation with SOC including London dispersion, using projected augmented wave functions.

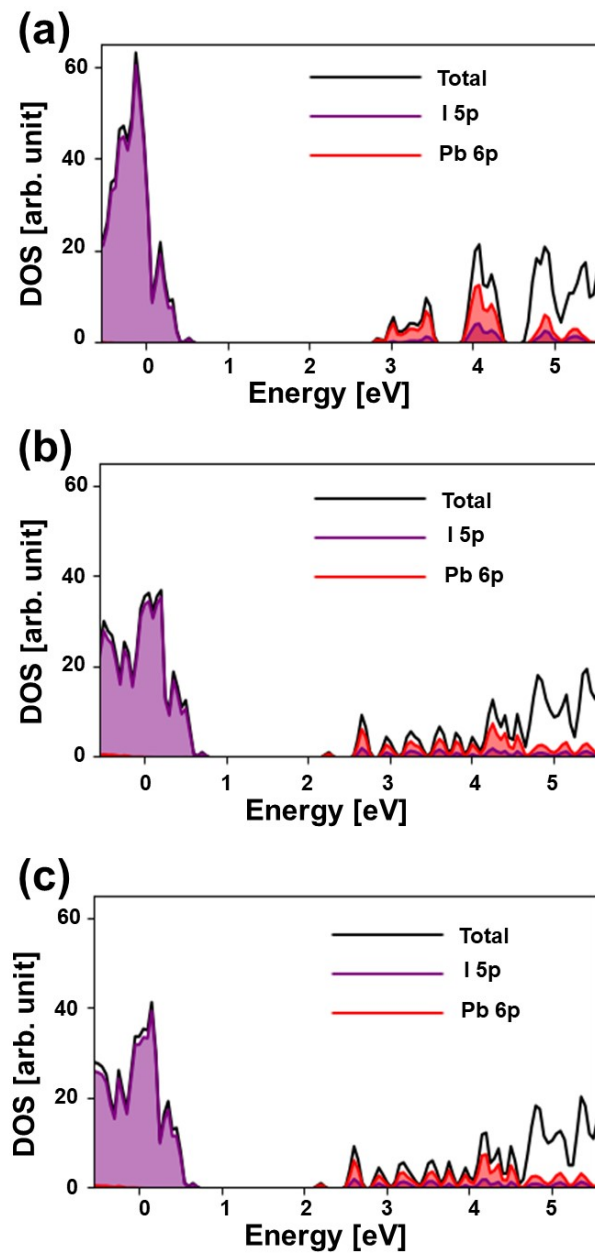

**Fig. S5** Calculated total and partial density of states (PDOS) of DDAPbI<sub>4</sub> within: (a) GGA approximation without SOC, core electrons represented by scalar-relativistic pseudopotentials, (b) GGA approximation with SOC, using projected augmented wave functions, (c) GGA approximation with SOC including London dispersion, using projected augmented wave functions.



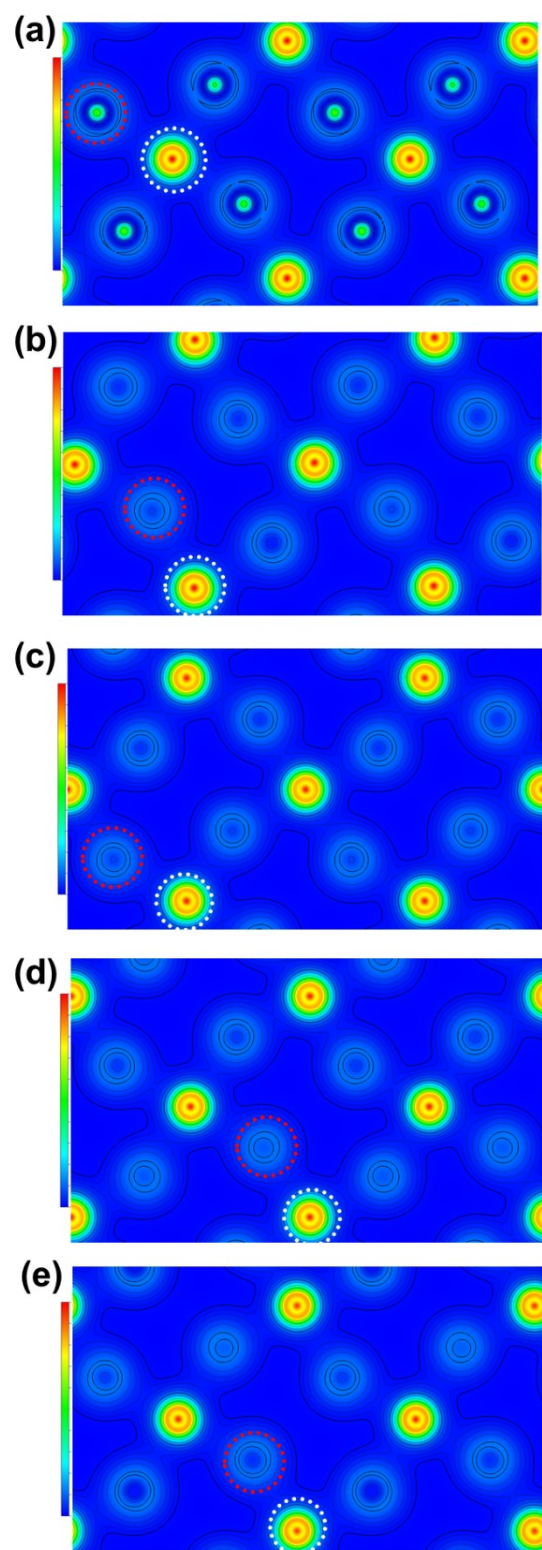

**Fig. S6** Charge density plots within the inorganic plane for (a)  $\text{MAPbI}_3$ , (b)  $\text{BDAPbI}_4$ , (c)  $\text{HDAPbI}_4$ , (d)  $\text{ODAPbI}_4$ , and (e)  $\text{DDAPbI}_4$ . The circles with white represent the lead atom and the circles with red represent the iodine atoms. A more covalent bond in between Pb and I for  $\text{MAPbI}_3$  can be observed compared to layered perovskite.

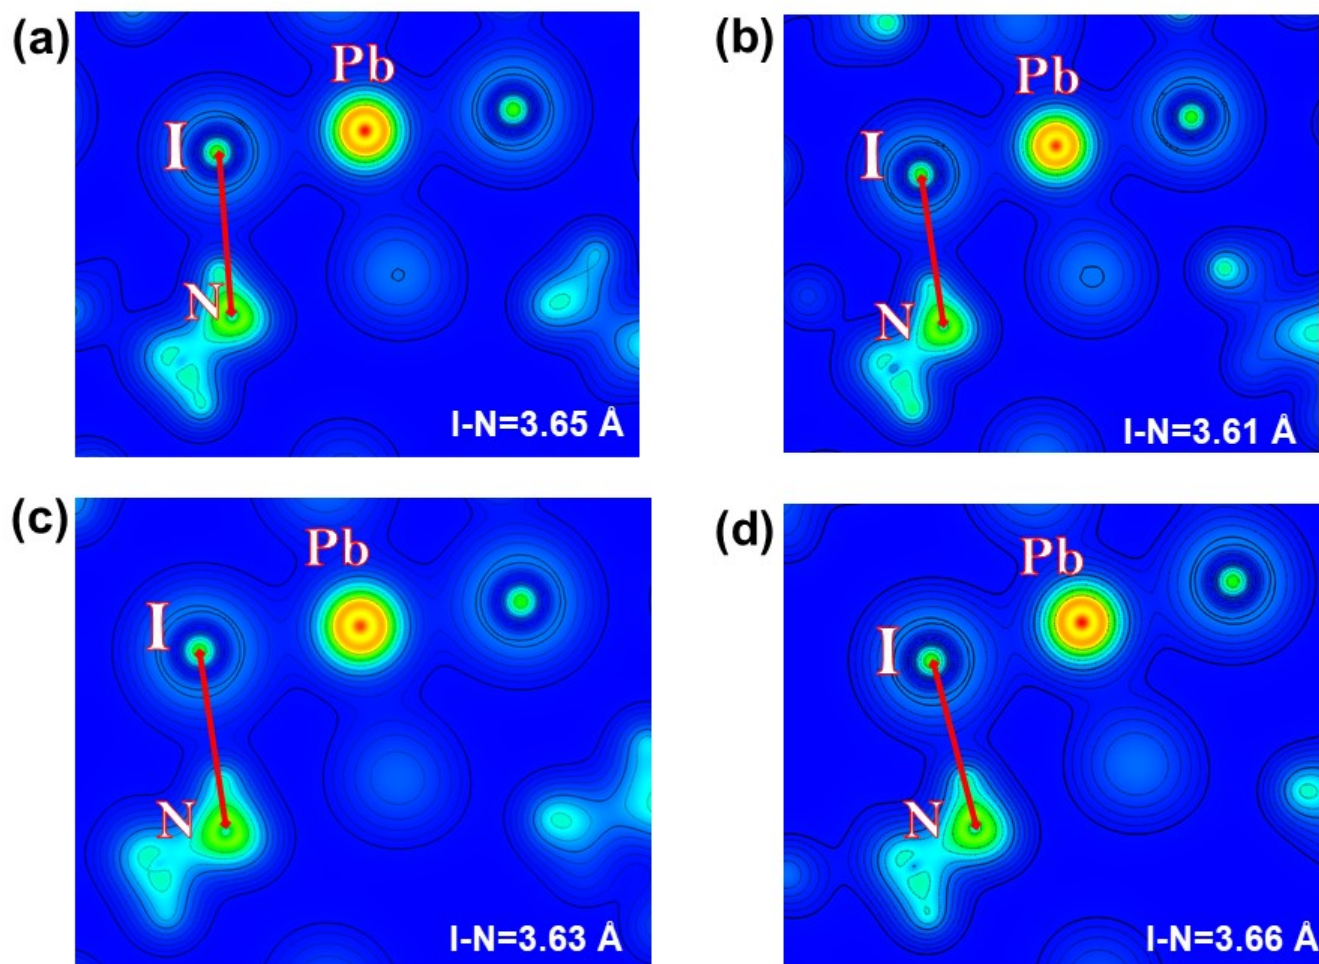

**Fig. S7** Charge density plots in between the inorganic plane and organic cation for (a) BDAPbI<sub>4</sub>, (b) HDAPbI<sub>4</sub>, (c) ODAPbI<sub>4</sub>, and (d) DDAPbI<sub>4</sub>.
